# Supplementary material for: Autonomous emergence of connectivity assemblies via spike triplet interactions
Source: PLOS journal article supplement (doi:10.1371/journal.pcbi.1007835), 2020-05-08
Supplement: S6 (10.1371/journal.pcbi.1007835.s006) [file journal.pcbi.1007835.s006.pdf]

# S1 Text

## Autonomous emergence of connectivity assemblies via spike triplet interactions

Lisandro Montangie<sup>1</sup>, Christoph Miehl<sup>1,2</sup>, Julijana Gjorgjieva<sup>1,2\*</sup>,

**1** Max Planck Institute for Brain Research, 60438 Frankfurt, Germany

**2** Technical University of Munich, School of Life Sciences, 85354 Freising, Germany

\*gjorgjieva@brain.mpg.de

### Fourier transform of covariance

We calculate the Fourier transform of the covariance  $C_{ij}$  (Eq. 29 in the Methods section) as

$$\begin{aligned}\tilde{C}_{ij}(\omega) &= \int_{-\infty}^{\infty} \left( \sum_{k=1}^N r_k \int_{-\infty}^{\infty} R_{ik}(u) R_{jk}(u - \tau) du \right) e^{-j\omega\tau} d\tau \\ &= \sum_{k=1}^N r_k \int_{-\infty}^{\infty} R_{ik}(u) \left( \int_{-\infty}^{\infty} R_{jk}(u - \tau) e^{-j\omega\tau} d\tau \right) du.\end{aligned}\tag{S1.1}$$

Multiplying the right side of the equation by  $e^{\pm j\omega u}$  and changing the variables as

$$\begin{cases} \tau &= x + y \\ u &= y \end{cases}\tag{S1.2}$$

Then, since the Jacobian of the transformation is 1, we obtain Eq. 33 as

$$\begin{aligned}\tilde{C}_{ij}(\omega) &= \sum_{k=1}^N r_k \int_{-\infty}^{\infty} R_{ik}(y) e^{-j\omega y} \left( \int_{-\infty}^{\infty} R_{jk}(-x) e^{-jx\omega} dx \right) dy \\ &= \sum_{k=1}^N r_k \tilde{R}_{jk}(-\omega) \int_{-\infty}^{\infty} R_{ik}(y) e^{-j\omega y} dy. \\ &= \sum_{k=1}^N r_k \tilde{R}_{ik}(\omega) \tilde{R}_{jk}(-\omega).\end{aligned}\tag{S1.3}$$

## Fourier transform of third order cumulant

In the same manner, we calculate the Fourier transform of the third order cumulant  $K_{ij}$  (Eq. 35 in the Methods section) as

$$\begin{aligned}
\tilde{K}_{ij}(\omega_1, \omega_2) = & \iint_{-\infty}^{\infty} d\tau_1 d\tau_2 e^{-j(\omega_1 \tau_1 + \omega_2 \tau_2)} \left( \sum_{k=1}^N r_k \int_{-\infty}^{\infty} R_{ik}(u) R_{jk}(u - \tau_1) R_{ik}(u - \tau_2) du \right. \\
& + \sum_{k,l=1}^N r_k \iint_{-\infty}^{\infty} R_{ik}(u) R_{jl}(v - \tau_1) R_{il}(v - \tau_2) \Psi_{lk}(v - u) dv du \\
& + \sum_{k,l=1}^N r_k \iint_{-\infty}^{\infty} R_{jk}(u - \tau_1) R_{il}(v) R_{il}(v - \tau_2) \Psi_{lk}(v - u) dv du \\
& \left. + \sum_{k,l=1}^N r_k \iint_{-\infty}^{\infty} R_{ik}(u - \tau_2) R_{il}(v) R_{jl}(v - \tau_1) \Psi_{lk}(v - u) dv du \right). \tag{S1.4}
\end{aligned}$$

Although Eq. S1.4 consists on four different terms, since the Fourier transform is a linear operation we can calculate each term independently. The first term is given by

$$\begin{aligned}
(1) = & \sum_{k=1}^N r_k \iiint_{-\infty}^{\infty} R_{ik}(u) R_{jk}(u - \tau_1) R_{ik}(u - \tau_2) e^{-j(\omega_1 \tau_1 + \omega_2 \tau_2)} d\tau_1 d\tau_2 du \\
= & \sum_{k=1}^N r_k \int_{-\infty}^{\infty} R_{ik}(u) \int_{-\infty}^{\infty} R_{jk}(u - \tau_1) e^{-j\omega_1 \tau_1} d\tau_1 \int_{-\infty}^{\infty} R_{ik}(u - \tau_2) e^{-j\omega_2 \tau_2} d\tau_2 du. \tag{S1.5}
\end{aligned}$$

Multiplying the right side of the equation by  $e^{\pm j\omega_1 u}$  and  $e^{\pm j\omega_2 u}$  and changing the variables as

$$\begin{cases} \tau_1 = x + y \\ \tau_2 = x' + y \\ u = y \end{cases} \tag{S1.6}$$

Again, since the Jacobian of the transformation is 1, we obtain

$$\begin{aligned}
(1) = & \sum_{k=1}^N r_k \int_{-\infty}^{\infty} R_{ik}(y) e^{-j(\omega_1 + \omega_2)y} dy \int_{-\infty}^{\infty} R_{jk}(-x) e^{-j\omega_1 x} dx \int_{-\infty}^{\infty} R_{ik}(-x') e^{-j\omega_2 x'} dx' \\
= & \sum_{k=1}^N r_k \tilde{R}_{ik}(\omega_1 + \omega_2) \tilde{R}_{jk}(-\omega_1) \tilde{R}_{ik}(-\omega_2). \tag{S1.7}
\end{aligned}$$

The second term of Eq. S1.4 is

$$\begin{aligned}
(2) = & \sum_{k,l=1}^N r_k \iiint_{-\infty}^{\infty} R_{ik}(u) R_{jl}(v - \tau_1) R_{il}(v - \tau_2) \Psi_{lk}(v - u) e^{-j(\omega_1 \tau_1 + \omega_2 \tau_2)} dv du d\tau_1 d\tau_2 \\
= & \sum_{k,l=1}^N r_k \iint_{-\infty}^{\infty} R_{ik}(u) \Psi_{lk}(v - u) \int_{-\infty}^{\infty} R_{jl}(v - \tau_1) e^{-j\omega_1 \tau_1} d\tau_1 \int_{-\infty}^{\infty} R_{il}(v - \tau_2) e^{-j\omega_2 \tau_2} d\tau_2 dv du \tag{S1.8}
\end{aligned}$$

First, we multiply the right side of the equation by  $e^{\pm j\omega_1 v}$  and  $e^{\pm j\omega_2 v}$  and change the variables as

$$\begin{cases} \tau_1 &= x + y' \\ \tau_2 &= x' + y' \\ u &= y \\ v &= y' \end{cases} \quad (\text{S1.9})$$

Again, since the Jacobian of the transformation is 1, we obtain

$$\begin{aligned} (2) &= \sum_{k,l=1}^N r_k \iint_{-\infty}^{\infty} R_{ik}(y) \Psi_{lk}(y' - y) e^{-j(\omega_1 + \omega_2)y'} dy' dy \int_{-\infty}^{\infty} R_{jl}(-x) e^{-j\omega_1 x} dx \int_{-\infty}^{\infty} R_{il}(-x') e^{-j\omega_2 x'} d\tau_2 \\ &= \sum_{k,l=1}^N r_k \tilde{R}_{jl}(-\omega_1) \tilde{R}_{il}(-\omega_2) \iint_{-\infty}^{\infty} R_{ik}(y) \Psi_{lk}(y' - y) e^{-j(\omega_1 + \omega_2)y'} dy' dy. \end{aligned} \quad (\text{S1.10})$$

Second, we multiply the right side of the equation by  $e^{\pm j(\omega_1 + \omega_2)y}$  and change the variables as

$$\begin{cases} y' &= x'' + y'' \\ y &= y'' \end{cases} \quad (\text{S1.11})$$

Next, the second term now is calculated as

$$\begin{aligned} (2) &= \sum_{k,l=1}^N r_k \tilde{R}_{il}(-\omega_1) \tilde{R}_{jl}(-\omega_2) \int_{-\infty}^{\infty} R_{ik}(y'') e^{-j(\omega_1 + \omega_2)y''} dy'' \int_{-\infty}^{\infty} \Psi_{lk}(x'') e^{-j(\omega_1 + \omega_2)x''} dx'' \\ &= \sum_{k,l=1}^N r_k \tilde{R}_{ik}(\omega_1 + \omega_2) \tilde{R}_{jl}(-\omega_1) \tilde{R}_{il}(-\omega_2) \tilde{\Psi}_{lk}(\omega_1 + \omega_2). \end{aligned} \quad (\text{S1.12})$$

The last two terms (3) and (4) of Eq. S1.4 are solved in the same way as done with the second term, and we obtain

$$(3) = \sum_{k,l=1}^N r_k \tilde{R}_{il}(\omega_1 + \omega_2) \tilde{R}_{jk}(-\omega_1) \tilde{R}_{il}(-\omega_2) \tilde{\Psi}_{lk}(-\omega_1) \quad (\text{S1.13})$$

and

$$(4) = \sum_{k,l=1}^N r_k \tilde{R}_{il}(\omega_1 + \omega_2) \tilde{R}_{jl}(-\omega_1) \tilde{R}_{ik}(-\omega_2) \tilde{\Psi}_{lk}(-\omega_2). \quad (\text{S1.14})$$

Finally, we derive Eq. 38 by summing all four terms in the Fourier domain.
