# Supplementary material for: Autonomous emergence of connectivity assemblies via spike triplet interactions
Source: PLOS journal article supplement (doi:10.1371/journal.pcbi.1007835), 2020-05-08
Supplement: S7 (10.1371/journal.pcbi.1007835.s007) [file journal.pcbi.1007835.s007.pdf]

## S2 Text

### Autonomous emergence of connectivity assemblies via spike triplet interactions

Lisandro Montangie<sup>1</sup>, Christoph Miehl<sup>1,2</sup>, Julijana Gjorgjieva<sup>1,2\*</sup>,

**1** Max Planck Institute for Brain Research, 60438 Frankfurt, Germany

**2** Technical University of Munich, School of Life Sciences, 85354 Freising, Germany

\*gjorgjieva@brain.mpg.de

### Calculation of motif coefficients up to third order

Under the condition that the STDP rule is balanced, in the sense that the total depression is equal to the total potentiation, we obtain the motif coefficients for the motif expansion up to third order in terms of the parameters of the STDP and EPSP functions. The first order motif coefficients that involve  $\alpha$ - and  $\beta$ -paths can be calculated as

$$M_{1,0} = 2\pi A_- \tau_- \left( \frac{\tau_+}{(\tau_\varepsilon + \tau_+) (\tau_\chi + \tau_+)} + \frac{\tau_y^2}{(\tau_\varepsilon + \tau_y) (\tau_+ + \tau_y) (\tau_\chi + \tau_y)} \right), \quad (\text{S2.1})$$

and

$$M_{0,1} = -2\pi A_- \tau_- \left( \frac{\eta_- \tau_-}{(\tau_\varepsilon + \eta_- \tau_-) (\tau_\chi + \eta_- \tau_-)} - \frac{\tau_+^2}{(\tau_\varepsilon + \tau_+) (\tau_+ + \tau_y) (\tau_\chi + \tau_+)} \right), \quad (\text{S2.2})$$

where  $\tau_\chi = \frac{\tau_\varepsilon \tau_l}{\tau_\varepsilon + \tau_l}$ . The second order motif coefficients are

$$M_{2,0} = 2\pi A_- \tau_- \left( \frac{\tau_+^3}{(\tau_\varepsilon + \tau_+)^2 (\tau_\chi + \tau_+)^2} + \frac{\tau_y^4}{(\tau_\varepsilon + \tau_y)^2 (\tau_+ + \tau_y) (\tau_\chi + \tau_y)^2} \right), \quad (\text{S2.3})$$

$$M_{0,2} = -2\pi A_- \tau_- \left( \frac{\eta_-^3 \tau_-^3}{(\tau_\varepsilon + \eta_- \tau_-)^2 (\tau_\chi + \eta_- \tau_-)^2} - \frac{\tau_+^4}{(\tau_\varepsilon + \tau_+)^2 (\tau_+ + \tau_y) (\tau_\chi + \tau_+)^2} \right), \quad (\text{S2.4})$$

and

$$M_{1,1} = \pi A_- \tau_- \left( \frac{(\tau_+ + \tau_v)}{(\tau_\varepsilon + \tau_+) (\tau_+ + \tau_\chi)} + \frac{2\tau_+^4}{(\tau_+ + \tau_y) (\tau_+^2 - \tau_\varepsilon^2) (\tau_+^2 - \tau_\chi^2)} + \frac{(\tau_\varepsilon + \tau_l)^2}{(\tau_\varepsilon + 2\tau_l) (\tau_\varepsilon - \tau_+) (\tau_\varepsilon + \tau_y)} \right. \\ \left. + \frac{\tau_l^3}{(\tau_\varepsilon + 2\tau_l) (\tau_\varepsilon + \tau_l) (\tau_+ - \tau_\chi) (\tau_y + \tau_\chi)} - \frac{(\eta_- \tau_- + \tau_v)}{(\tau_\varepsilon + \eta_- \tau_-) (\eta_- \tau_- + \tau_\chi)} \right), \quad (\text{S2.5})$$

where  $\tau_\nu = \frac{\tau_\varepsilon \tau_l}{\tau_\varepsilon + 2\tau_l}$ . Finally, the four third order coefficients are calculated as

$$M_{3,0} = 2\pi A_- \tau_- \left( \frac{\tau_+^5}{(\tau_\varepsilon + \tau_+)^3 (\tau_\chi + \tau_+)^3} + \frac{\tau_y^6}{(\tau_\varepsilon + \tau_y)^3 (\tau_+ + \tau_y) (\tau_\chi + \tau_y)^3} \right), \quad (\text{S2.6})$$

$$M_{0,3} = -2\pi A_- \tau_- \left( \frac{\eta_-^5 \tau_-^5}{(\tau_\varepsilon + \eta_- \tau_-)^3 (\tau_\chi + \eta_- \tau_-)^3} - \frac{\tau_+^6}{(\tau_\varepsilon + \tau_+)^3 (\tau_+ + \tau_y) (\tau_\chi + \tau_+)^3} \right), \quad (\text{S2.7})$$

$$\begin{aligned} M_{2,1} = & \frac{\pi}{2} A_- \tau_- \left( \frac{13\tau_+^3 \tau_l^3 + \tau_\varepsilon^4 (\tau_l + \tau_+)^2 + \tau_\varepsilon^3 (\tau_l + \tau_+) (2\tau_l + \tau_+) (\tau_l + 3\tau_+)}{(\tau_\varepsilon + \tau_l) (\tau_\varepsilon + 2\tau_l)^2 (\tau_\varepsilon + \tau_+)^2 (\tau_\chi + \tau_+)^2} - \frac{(\tau_\varepsilon + \tau_l)^3}{\tau_\varepsilon (\tau_\varepsilon + 2\tau_l)^3 (\tau_\varepsilon + \eta_- \tau_-)} \right. \\ & + \frac{\tau_+ \tau_\varepsilon^2 \tau_l (3\tau_l + 4\tau_+)^2 + 2\tau_\varepsilon \tau_l^2 \tau_+^2 (8\tau_l + 13\tau_+)}{(\tau_\varepsilon + \tau_l) (\tau_\varepsilon + 2\tau_l)^2 (\tau_\varepsilon + \tau_+)^2 (\tau_\chi + \tau_+)^2} + \frac{(\tau_+^2 + \tau_y^2) \tau_\varepsilon^2 \tau_\chi^2 (2\tau_\varepsilon^2 + 9\tau_\varepsilon \tau_l + 9\tau_l^2)}{(\tau_\varepsilon + 2\tau_l)^2 (\tau_\varepsilon + \tau_+) (\tau_\chi + \tau_+) (\tau_\varepsilon + \tau_y)^2 (\tau_+ + \tau_y) (\tau_\chi + \tau_y)^2} \\ & + \frac{4\tau_+^2 \tau_y^4 (\tau_\varepsilon^2 + 3\tau_\varepsilon \tau_l + 2\tau_l^2)^2 + \tau_y^2 \tau_\varepsilon (\tau_\varepsilon^3 + 10\tau_\varepsilon^2 \tau_l + 24\tau_\varepsilon \tau_l^2 + 16\tau_l^3)}{(\tau_\varepsilon + \tau_l)^2 (\tau_\varepsilon + 2\tau_l)^2 (\tau_\varepsilon + \tau_+) (\tau_\chi + \tau_+) (\tau_\varepsilon + \tau_y)^2 (\tau_+ + \tau_y) (\tau_\chi + \tau_y)^2} \\ & + \frac{\tau_l^3}{\tau_\varepsilon (\tau_\varepsilon + 2\tau_l)^2 (\tau_\chi + \eta_- \tau_-)} + \frac{3\tau_+ \tau_y \tau_\varepsilon^2 \tau_\chi^2 + (\tau_+ + \tau_y) \tau_\varepsilon^2 \tau_\nu \tau_\chi^2}{(\tau_\varepsilon + \tau_+) (\tau_\chi + \tau_+) (\tau_\varepsilon + \tau_y)^2 (\tau_+ + \tau_y) (\tau_\chi + \tau_y)^2} \\ & + \frac{3\tau_+ \tau_y^2 \tau_\varepsilon^2 \tau_\chi (\tau_\varepsilon^2 + 5\tau_\varepsilon \tau_l + 5\tau_l^2)}{(\tau_\varepsilon + \tau_l) (\tau_\varepsilon + 2\tau_l) (\tau_\varepsilon + \tau_+) (\tau_\chi + \tau_+) (\tau_\varepsilon + \tau_y)^2 (\tau_+ + \tau_y) (\tau_\chi + \tau_y)^2} \\ & + \frac{\tau_y \tau_\varepsilon \tau_\chi + \tau_+ \tau_y \tau_\varepsilon^2 \tau_\chi (2\tau_\varepsilon^3 + 11\tau_\varepsilon^2 \tau_l + 21\tau_\varepsilon \tau_l^2 + 14\tau_l^3) + \tau_y^4 \tau_\varepsilon \tau_\chi (3\tau_\varepsilon^3 + 16\tau_\varepsilon^2 \tau_l + 26\tau_\varepsilon \tau_l^2 + 13\tau_l^3)}{(\tau_\varepsilon + \tau_l) (\tau_\varepsilon + 2\tau_l)^2 (\tau_\varepsilon + \tau_+) (\tau_\chi + \tau_+) (\tau_\varepsilon + \tau_y)^2 (\tau_+ + \tau_y) (\tau_\chi + \tau_y)^2} \\ & + \frac{\tau_+ \tau_y^4 \tau_\varepsilon (3\tau_\varepsilon^3 + 17\tau_\varepsilon^2 \tau_l + 28\tau_\varepsilon \tau_l^2 + 14\tau_l^3) + \tau_+ \tau_y^3 \tau_\varepsilon^2 (\tau_\varepsilon^3 + 12\tau_\varepsilon^2 \tau_l + 30\tau_\varepsilon \tau_l^2 + 20\tau_l^3)}{(\tau_\varepsilon + \tau_l)^2 (\tau_\varepsilon + 2\tau_l) (\tau_\varepsilon + \tau_+) (\tau_\chi + \tau_+) (\tau_\varepsilon + \tau_y)^2 (\tau_+ + \tau_y) (\tau_\chi + \tau_y)^2} \\ & \left. + \frac{\tau_+^2 \tau_y^2 \tau_\varepsilon^2 (\tau_\varepsilon^4 + 11\tau_\varepsilon^3 \tau_l + 38\tau_\varepsilon^2 \tau_l^2 + 54\tau_\varepsilon \tau_l^3 + 27\tau_l^4) + \tau_+^2 \tau_y^3 \tau_\varepsilon (3\tau_\varepsilon^4 + 23\tau_\varepsilon^3 \tau_l + 62\tau_\varepsilon^2 \tau_l^2 + 70\tau_\varepsilon \tau_l^3 + 28\tau_l^4)}{(\tau_\varepsilon + \tau_l)^2 (\tau_\varepsilon + 2\tau_l)^2 (\tau_\varepsilon + \tau_+) (\tau_\chi + \tau_+) (\tau_\varepsilon + \tau_y)^2 (\tau_+ + \tau_y) (\tau_\chi + \tau_y)^2} \right), \quad (\text{S2.8}) \end{aligned}$$

and

$$\begin{aligned}
M_{1,2} = & -\frac{\pi}{2} A_- \tau_- \left( \frac{13\eta_-^3 \tau_-^3 \tau_l^3 + \tau_\varepsilon^4 (\tau_l + \eta_- \tau_-)^2 + \tau_\varepsilon^3 (\tau_l + \eta_- \tau_-) (2\tau_l + \eta_- \tau_-) (\tau_l + 3\eta_- \tau_-)}{(\tau_\varepsilon + \tau_l) (\tau_\varepsilon + 2\tau_l)^2 (\tau_\varepsilon + \eta_- \tau_-)^2 (\tau_\chi + \eta_- \tau_-)^2} \right. \\
& + \frac{\eta_- \tau_- \tau_\varepsilon^2 \tau_l (3\tau_l + 4\eta_- \tau_-)^2 + 2\eta_-^2 \tau_\varepsilon \tau_l^2 \tau_-^2 (8\tau_l + 13\eta_- \tau_-)}{(\tau_\varepsilon + \tau_l) (\tau_\varepsilon + 2\tau_l)^2 (\tau_\varepsilon + \eta_- \tau_-)^2 (\tau_\chi + \eta_- \tau_-)^2} - \frac{4\tau_+^4 \tau_y^2 + \tau_y \tau_\varepsilon^2 \tau_\nu \tau_\chi^2 + 6\tau_+ \tau_y \tau_\varepsilon \tau_\nu \tau_\chi^2 + 7\tau_+ \tau_y^2 \tau_\nu \tau_\chi^2}{(\tau_\varepsilon + \tau_+)^2 (\tau_\chi + \tau_+)^2 (\tau_\varepsilon + \tau_y) (\tau_+ + \tau_y) (\tau_\chi + \tau_y)} \\
& + \frac{7\tau_+ \tau_y^2 \tau_\varepsilon^2 \tau_\chi^2}{(\tau_\varepsilon + \tau_l)^3} - \frac{\tau_\varepsilon (\tau_\varepsilon + 2\tau_l)^3 (\tau_\varepsilon + \tau_+)}{(\tau_\varepsilon + \tau_+)^2 (\tau_\chi + \tau_+)^2 (\tau_\varepsilon + \tau_y) (\tau_+ + \tau_y) (\tau_\chi + \tau_y) (\tau_\varepsilon + 2\tau_l)} \\
& + \frac{\tau_+^2 \tau_\varepsilon^2 \tau_\chi^2 (\tau_\varepsilon + 3\tau_l) (2\tau_\varepsilon + 3\tau_l) + \tau_y^2 \tau_\varepsilon^2 \tau_\chi^2 (\tau_\varepsilon^2 + 3\tau_\varepsilon \tau_l + 3\tau_l^2) + \tau_+^4 \tau_\varepsilon \tau_\chi (3\tau_\varepsilon^2 + 13\tau_\varepsilon \tau_l + 13\tau_l^2)}{(\tau_\varepsilon + 2\tau_l)^2 (\tau_\varepsilon + \tau_+)^2 (\tau_\chi + \tau_+)^2 (\tau_\varepsilon + \tau_y) (\tau_+ + \tau_y) (\tau_\chi + \tau_y)} \\
& + \frac{(\tau_+^4 \tau_y \tau_\varepsilon + \tau_+^3 \tau_y^2 \tau_\varepsilon^2) (3\tau_\varepsilon^2 + 14\tau_\varepsilon \tau_l + 14\tau_l^2) + 3\tau_+^2 \tau_y \tau_\varepsilon^2 \tau_\chi (\tau_\varepsilon^2 + 5\tau_\varepsilon \tau_l + 5\tau_l^2) + \tau_+ \tau_\varepsilon^4 \tau_\chi (\tau_l + \tau_y) (\tau_l + 2\tau_y)}{(\tau_\varepsilon + \tau_l) (\tau_\varepsilon + 2\tau_l) (\tau_\varepsilon + \tau_+)^2 (\tau_\chi + \tau_+)^2 (\tau_\varepsilon + \tau_y) (\tau_+ + \tau_y) (\tau_\chi + \tau_y)} \\
& + \frac{\tau_l^3}{\tau_\varepsilon (\tau_\varepsilon + 2\tau_l)^2 (\tau_\chi + \tau_+)} + \frac{\tau_+^3 \tau_\varepsilon^2 \tau_\chi}{(\tau_\varepsilon + \tau_l) (\tau_\varepsilon + 2\tau_l) (\tau_\varepsilon + \tau_+)^2 (\tau_\chi + \tau_+)^2 (\tau_\varepsilon + \tau_y) (\tau_+ + \tau_y) (\tau_\chi + \tau_y)} \\
& + \frac{\tau_+^2 \tau_y^2 \tau_\varepsilon^2 (\tau_\varepsilon^4 + 11\tau_\varepsilon^3 \tau_l + 38\tau_\varepsilon^2 \tau_l^2 + 54\tau_\varepsilon \tau_l^3 + 27\tau_l^4)}{(\tau_\varepsilon + \tau_l)^2 (\tau_\varepsilon + 2\tau_l)^2 (\tau_\varepsilon + \tau_+)^2 (\tau_\chi + \tau_+)^2 (\tau_\varepsilon + \tau_y) (\tau_+ + \tau_y) (\tau_\chi + \tau_y)} \\
& \left. + \frac{\tau_+^3 \tau_y \tau_\varepsilon^2 (\tau_\varepsilon^2 + 10\tau_\varepsilon \tau_l + 10\tau_l^2)}{(\tau_\varepsilon + \tau_l)^2 (\tau_\varepsilon + \tau_+)^2 (\tau_\chi + \tau_+)^2 (\tau_\varepsilon + \tau_y) (\tau_+ + \tau_y) (\tau_\chi + \tau_y)} \right). \tag{S2.9}
\end{aligned}$$
